# Supplementary material for: Effects of AQP5 gene silencing on proliferation, migration and apoptosis of human glioma cells through regulating EGFR/ERK/ p38 MAPK signaling pathway
Source: PubMed Central journal article supplement (PMC5503544; doi:10.18632/oncotarget.16461), 2017-03-22
Supplement: oncotarget-08-38444-s001.pdf [file oncotarget-08-38444-s001.pdf]

# Effects of AQP5 gene silencing on proliferation, migration and apoptosis of human glioma cells through regulating EGFR/ERK/p38 MAPK signaling pathway

## Supplementary Materials

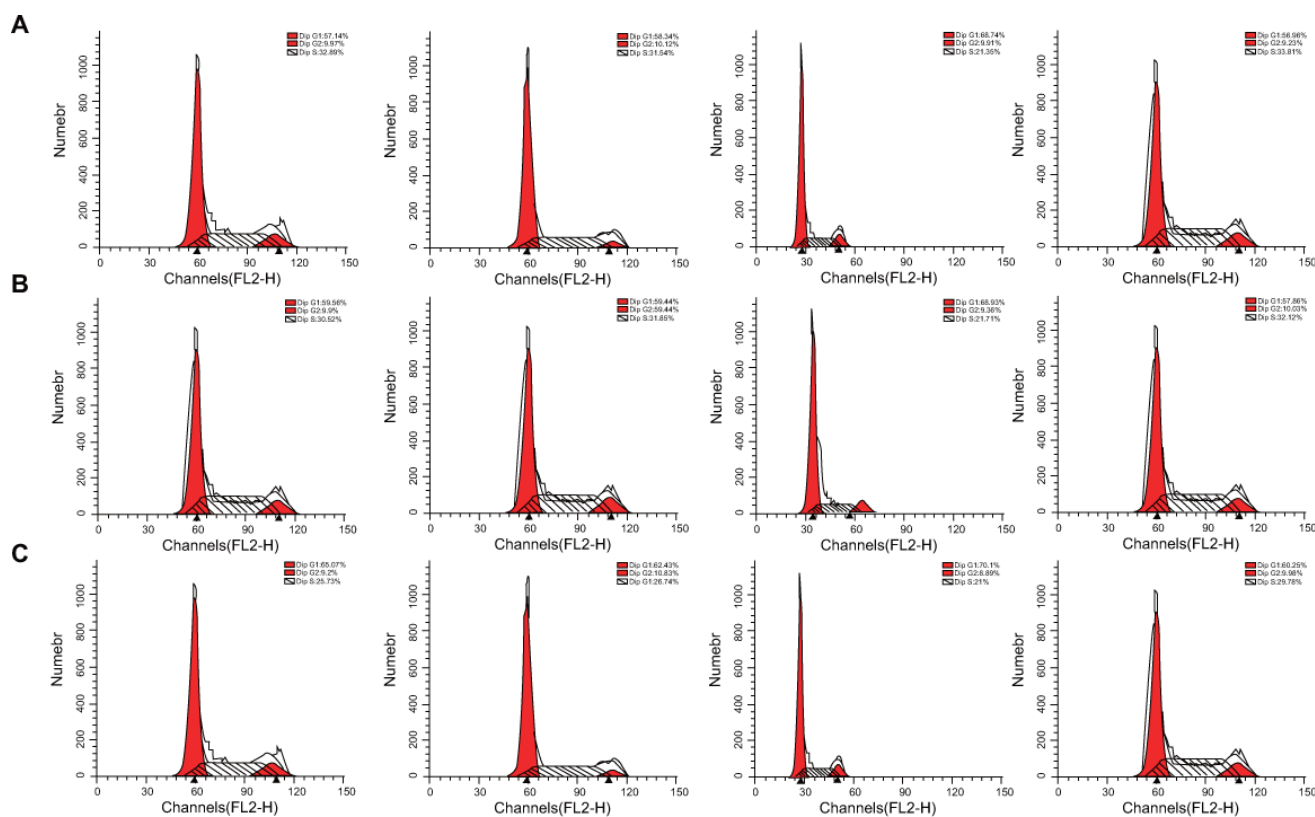

Supplementary Figure 1: Effect of *AQP5* gene silencing on the cell cycle of U87-MG, U251 and LN229 at 24 h after transfection. (A) U87-MG; (B) U251; (C) LN229.
